# Supplementary material for: Preparation and chromatographic evaluation of the hydrophilic interaction chromatography stationary phase based on nucleosides or nucleotides
Source: Royal Society of Chemistry journal article supplement (doi:10.1039/d0ay02016h), 2020-12-17
Supplement: d0ay02016h1.pdf [file d0ay02016h1.pdf]

## ELECTRONIC SUPPLEMENTARY INFORMATION (ESI)

# Preparation and chromatographic evaluation of hydrophilic interaction chromatography stationary phase based on nucleosides or nucleotides

Tingfeng Tang<sup>a</sup>, Dandan Guo<sup>a</sup>, and Shaohua Huang<sup>\*a,b</sup>

<sup>a</sup> *Institute of Drug Discovery Technology, Ningbo University, Ningbo 315211, China.*

<sup>b</sup> *Qian Xuesen Collaborative Research Center of Astrochemistry and Space Life Sciences, Ningbo University, Ningbo 315211, China.*

(Corresponding author. E-mail address: [huangshaohua@nbu.edu.cn](mailto:huangshaohua@nbu.edu.cn) (S. Huang))

### Table of Contents:

|                  |   |
|------------------|---|
| 1. Fig. S1.....  | 2 |
| 2. Fig. S2.....  | 2 |
| 3. Table S1..... | 3 |
| 4. Fig. S3.....  | 4 |
| 5. Table S2..... | 5 |
| 6. Table S3..... | 5 |
| 7. Table S4..... | 6 |
| 8. Table S5..... | 7 |

(Total 7 pages including this cover page)

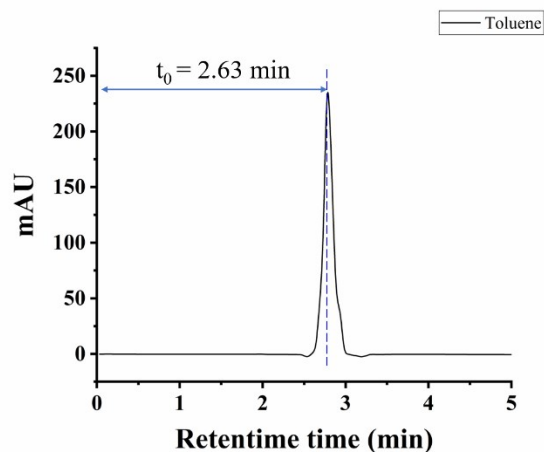

Fig. S1. The retention time of toluene on column GM-ADE. Mobile phase: acetonitrile and water (90/10, v/v), flow rate=1.0 mL min<sup>-1</sup>, column temperature = 30 °C, UV detection: 254 nm.

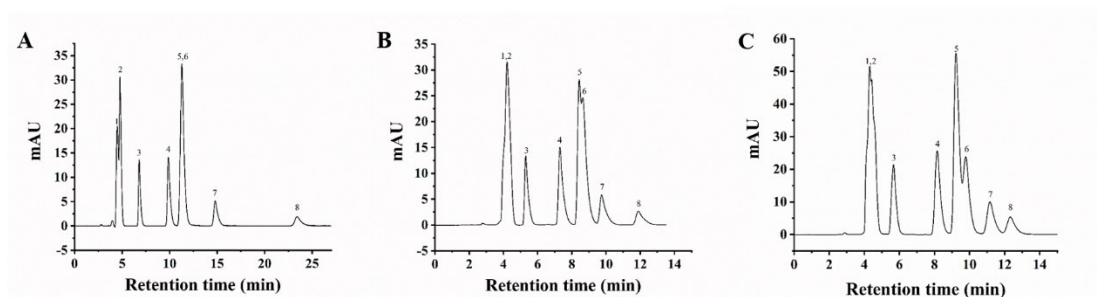

Fig. S2. Separation of eight nucleosides and nucleobases on (A) GM-AMP column, (B) GM-CYT column, and (C) GM-CMP column, respectively. Column dimensions: 4.6 mm I.D. by 250 mm, mobile phase: acetonitrile and 20 mM ammonium acetate aqueous solution (90/10, v/v), flow rate = 1.0 mL min<sup>-1</sup>, column temperature = 30 °C, pH = 6.54, detection wavelength: 254 nm. (1) Thymine, (2) Uracil, (3) Uridine, (4) Adenosine, (5) Adenine, (6) Cytosine, (7) Cytidine, and (8) Guanosine.

**Table S1** Chromatographic parameters for the separation of nucleosides and nucleobases on GM-ADE column.

| Analytes  | N/m   | Rs    | Tf    |
|-----------|-------|-------|-------|
| Thymine   | 10146 | /     | 1.191 |
| Uracil    | 23063 | 0.860 | 0.988 |
| Uridine   | 31688 | 4.807 | 0.754 |
| Adenosine | 34202 | 8.988 | 0.734 |
| Adenine   | 41808 | 2.547 | 0.889 |
| Cytosine  | 43031 | 1.215 | 0.941 |
| Cytidine  | 34632 | 3.007 | 0.725 |
| Guanosine | 30796 | 2.853 | 0.646 |

Notes: N: theoretical plate number; Rs: resolution; Tf: tailing factor

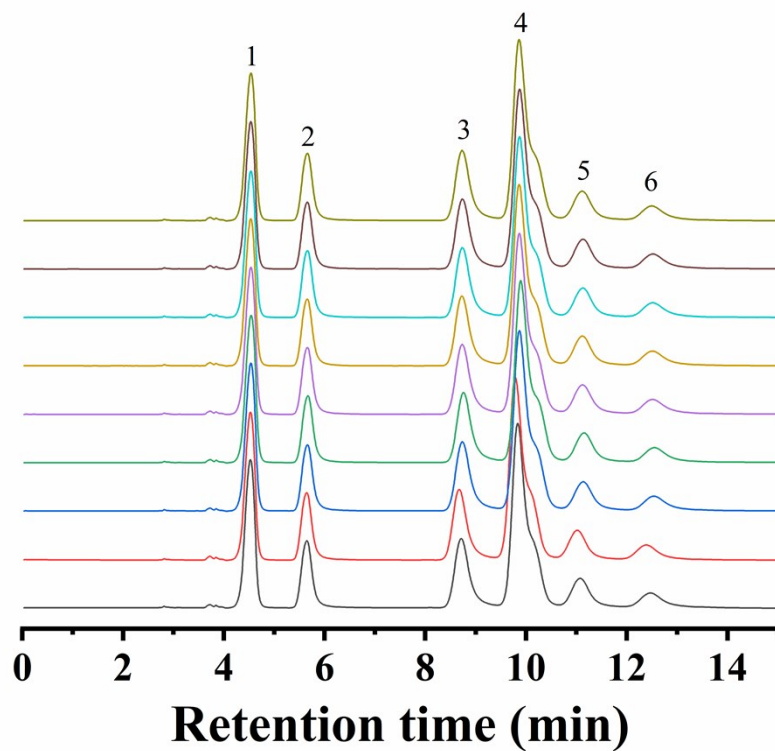

Fig. S3. The reproducibility tests of nucleosides and nucleases on GM-ADE column: (1) Uracil, (2) Uridine, (3) Adenosine, (4) Adenine, (5) Cytidine and (6) Guanosine. Mobile phase: acetonitrile and water (90/10, v/v), flow rate=1.0 mL min<sup>-1</sup>, column temperature = 30 °C, UV detection: 254 nm. (Continuously injecting 9 times with an interval of 15 min of incessantly working.)

**Table S2** Intra-day and Inter-day RSD of the retention time for model analytes.

| Analytes  | Intra-day (RSD, %) |      |      | Inter-day (RSD, %) |
|-----------|--------------------|------|------|--------------------|
|           | 1                  | 2    | 3    |                    |
| Uracil    | 0.12               | 0.10 | 0.05 | 0.10               |
| Uridine   | 0.13               | 0.14 | 0.12 | 0.11               |
| Adenosine | 0.28               | 0.30 | 0.26 | 0.23               |
| Adenine   | 0.32               | 0.33 | 0.29 | 0.22               |
| Cytidine  | 0.37               | 0.39 | 0.35 | 0.32               |
| Guanosine | 0.39               | 0.40 | 0.39 | 0.32               |

**Table S3** Intra-day and Inter-day RSD of the peak area for model analytes.

| Analytes  | Intra-day (RSD, %) |      |      | Inter-day (RSD, %) |
|-----------|--------------------|------|------|--------------------|
|           | 1                  | 2    | 3    |                    |
| Uracil    | 0.06               | 0.06 | 0.05 | 0.02               |
| Uridine   | 0.19               | 0.25 | 0.21 | 0.12               |
| Adenosine | 0.17               | 0.46 | 0.29 | 0.50               |
| Adenine   | 0.06               | 0.15 | 0.12 | 0.18               |
| Cytidine  | 0.28               | 0.51 | 0.21 | 1.17               |
| Guanosine | 0.63               | 0.76 | 1.21 | 0.91               |

**Table S4** Intra-day and Inter-day RSD of the peak height for model analytes.

| Analytes  | Intra-day (RSD, %) |      |      | Inter-day (RSD, %) |
|-----------|--------------------|------|------|--------------------|
|           | 1                  | 2    | 3    |                    |
| Uracil    | 0.38               | 0.50 | 0.52 | 0.07               |
| Uridine   | 0.56               | 0.52 | 0.58 | 0.65               |
| Adenosine | 0.62               | 0.37 | 0.70 | 0.99               |
| Adenine   | 0.79               | 0.95 | 0.82 | 0.31               |
| Cytidine  | 0.93               | 0.88 | 1.01 | 1.55               |
| Guanosine | 1.07               | 1.23 | 1.19 | 1.14               |

**Table S5** Chromatographic parameters for the separation of amino acids and water-soluble vitamins on GM-ADE column.

|                        | Analytes                 | N/m   | Rs     | Tf    |
|------------------------|--------------------------|-------|--------|-------|
| Amino acids            | Phenylalanine            | 31642 | /      | 0.997 |
|                        | Methionine               | 41876 | 1.736  | 0.665 |
|                        | Proline                  | 52787 | 2.296  | 0.712 |
|                        | Valine                   | 58057 | 3.253  | 0.892 |
|                        | Alanine                  | 65300 | 1.717  | 0.740 |
|                        | Serine                   | 45538 | 1.665  | 0.709 |
|                        | Glutamine                | 40271 | 1.031  | 0.708 |
|                        | Nicotinamide             | 36656 | /      | 0.920 |
| water-soluble vitamins | Pyridoxine hydrochloride | 23049 | 4.086  | 0.623 |
|                        | Riboflavin               | 32420 | 1.509  | 0.910 |
|                        | Orotic acid              | 21953 | 12.027 | 1.009 |
|                        | Thiamine chloride        | 33467 | 2.589  | 0.550 |
|                        | Nicotinic acid           | 52747 | 7.770  | 1.276 |

Notes: N: theoretical plate number; Rs: resolution; Tf: tailing factor
